# Supplementary material for: Pyruvate kinase isozyme M2 and glutaminase might be promising molecular targets for the treatment of gastric cancer
Source: PubMed Central journal article supplement — Cancer Sci. 2017 Nov 27;108(12):2462–9. doi: 10.1111/cas.13421 (PMC5715358; doi:10.1111/cas.13421), 2017-11-27
Supplement: CAS-108-2462-s001.pdf [file CAS-108-2462-s001.pdf]

# Supplement figure S1. Kitayama K. et al.

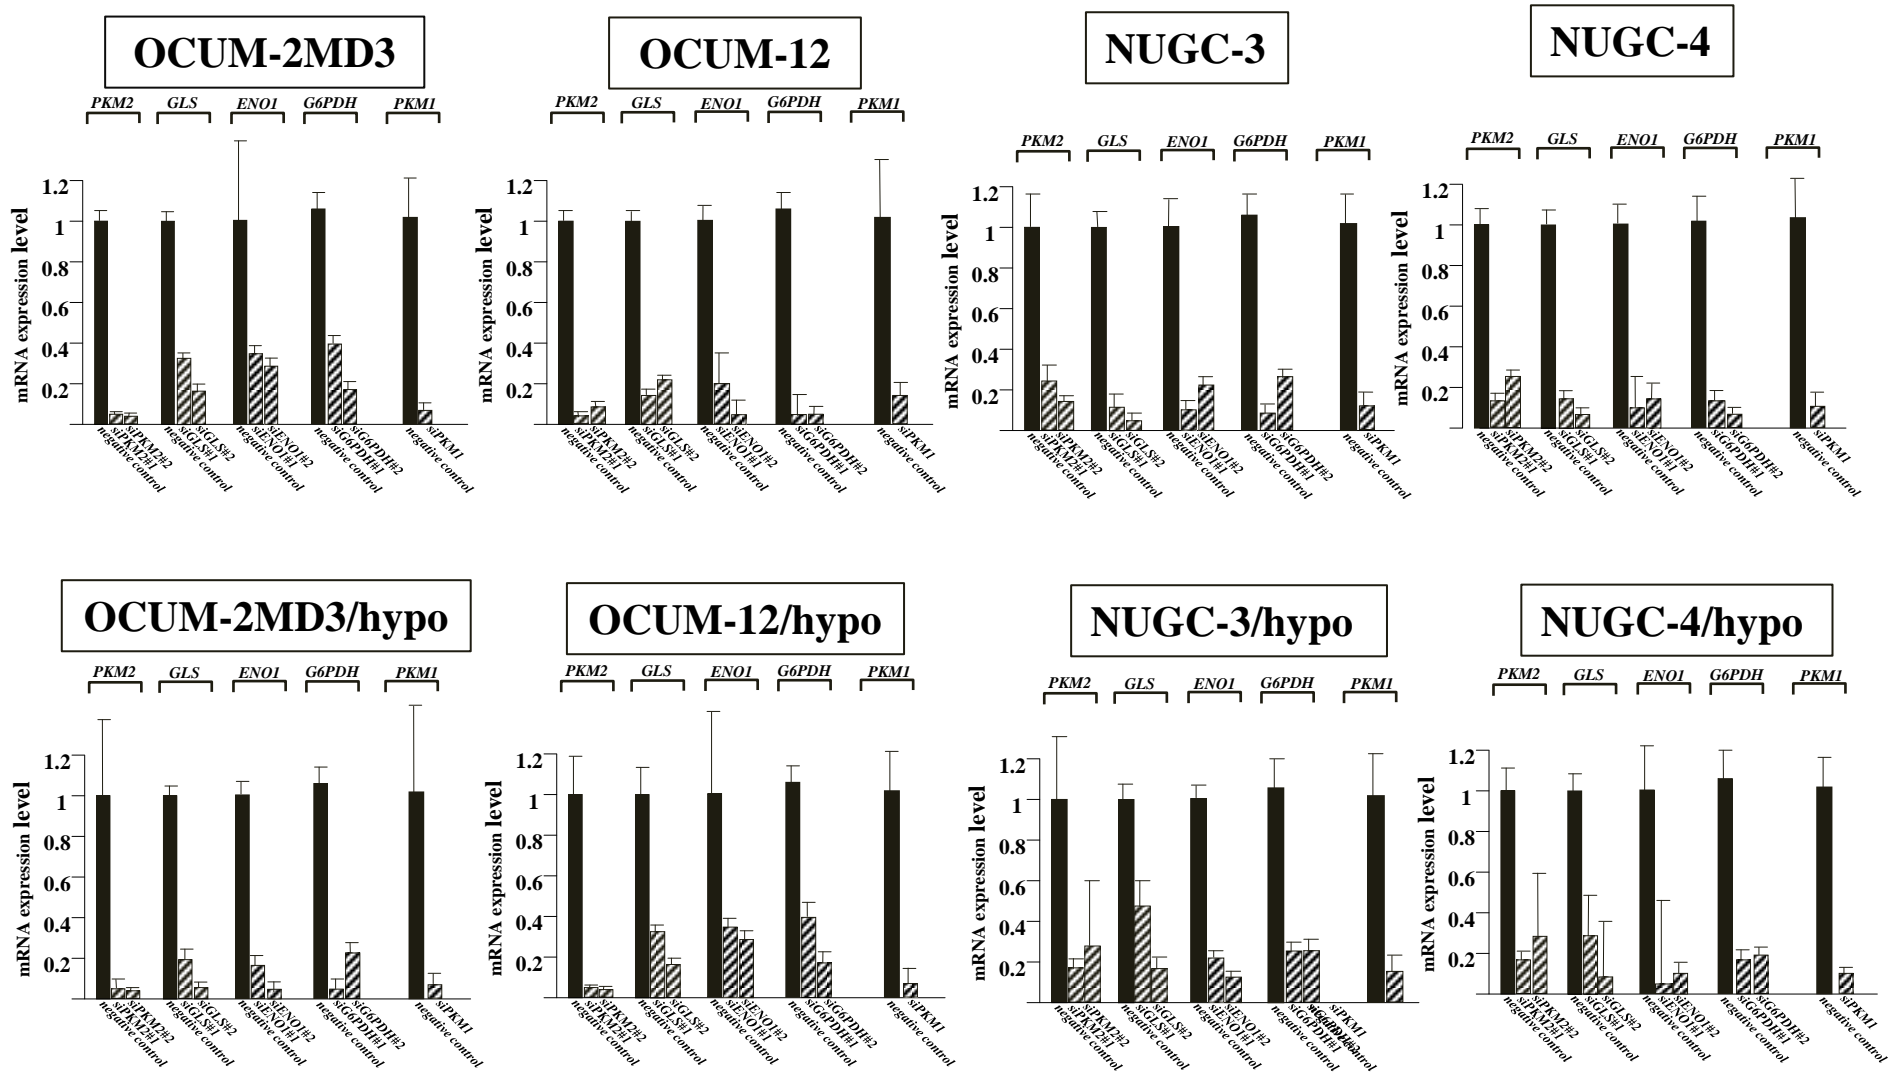

**Supplement Figure S1. Knockdown of *PKM2*, *ENO1*, *GLS*, *G6PDH*, and *PKM1*.** RT-PCR analysis indicated that *PKM2*, *ENO1*, *GLS*, *G6PDH*, and *PKM1* expression were effectively downregulated by siRNA (*siPKM2*#1, *siPKM2*#2, *siGLS*#1, *siGLS*#2, *siENO1*#1, *siENO1*#2, *siG6PDH*#1, *siG6PDH*#2 and *siPKM1*) in all of 8 cell lines, in compared to the negative control *siRNA* group. Results are presented as the mean for three independent experiments; bars indicate SDs.
